# Supplementary material
Source: publisher figshare collection journal article supplement (https://geolsoc.figshare.com/ndownloader/files/15191384)
Supplement: Supplementary file 1 [file 15191384]

## Sheet: Vanta_RockSlab_Stds
	Sr (ppm)		MnO (wt%)		Y (ppm)
	Vanta pXRF	Standard value	Vanta pXRF	Standard value	Vanta pXRF	Standard value
TasGran	149.7	147	0.0414217	0.04	34.5	32.5
TasGran	148.5	147	0.0405437	0.04	34.4	32.5
TasGran	148	147	0.0411893	0.04	34	32.5
TasGran	149.7	147	0.0414217	0.04	34.5	32.5
TasGran	148.5	147	0.0405437	0.04	34.4	32.5
TasMonz	355	345	0.131573	0.13	20	19.1
TasMonz	348.4	345	0.133575	0.13	20	19.1
TasMonz	349	345	0.131393	0.13	18.8	19.1
TasMonz	353	345	0.129766	0.13	19	19.1
TasMonz	353	345	0.138288	0.13	21	19.1
TasMonz	350	345	0.127958	0.13	20	19.1
TasMonz	348.4	345	0.133575	0.13	20	19.1
TasMonz	349	345	0.131393	0.13	18.8	19.1
TasDior	336	328	0.118274	0.11	16	15.7
TasDior	335	328	0.113496	0.11	15	15.7
TasDior	337	328	0.113367	0.11	16	15.7
TasBas	995	1008	0.164112	0.17	19	19.5
TasBas	1002	1008	0.164886	0.17	18	19.5
TasBas	994	1008	0.156106	0.17	19	19.5
TasBas	1005	1008	0.159463	0.17	19	19.5

## Sheet: Vanta_PulpPress_Stds
	Sr (ppm)		MnO (wt%)		Y (ppm)
	Vanta pXRF	Standard value	Vanta pXRF	Standard value	Vanta pXRF	Standard value
TasGran	1262	147	0.20104	0.04	22	32.5
TasGran	870	147	0.0302141	0.04	21	32.5
TasGran	1005	147	0.160496	0.04	19	32.5
TasGran	321	147	0.00942576	0.04	15	32.5
TasGran	662	147	0.0702413	0.04	20	32.5
TasMonz	148	345	0.0444173	0.13	35	19.1
TasMonz	876	345	0.0380904	0.13	6	19.1
TasMonz	588	345	0.195617	0.13	17	19.1
TasMonz	540	345	0.169018	0.13	15	19.1
TasMonz	99	345	0.0986477	0.13	26	19.1
TasMonz	1061	345	0.0395107	0.13	10	19.1
TasBas	356	1008	0.129895	0.17	21	19.5
TasBas	1204	1008	0.0224669	0.17	8	19.5
TasBas	296	1008	0.121115	0.17	15	19.5
TasBas	599	1008	0.0313762	0.17	15	19.5
